# Supplementary material for: Efficient Production of Chimeric Hepatitis B Virus-Like Particles Bearing an Epitope of Hepatitis E Virus Capsid by Transient Expression in Nicotiana benthamiana
Source: Life (Basel). 2021 Jan 17;11(1):64. doi: 10.3390/life11010064 (PMC7830250; doi:10.3390/life11010064)
Supplement: Supplementary file 1 [file life-11-00064-s001.pdf]

Article

# Efficient Production of Chimeric Hepatitis B Virus-Like Particles Bearing an Epitope of Hepatitis E Virus Capsid by Transient Expression in *Nicotiana Benthiana*

Gergana Zahmanova <sup>1,2,\*</sup>, Milena Mazalovska <sup>1</sup>, Katerina Takova <sup>1</sup>, Valentina Toneva <sup>1,3</sup>, Ivan Minkov <sup>2,3</sup>, Hadrien Peyret <sup>4</sup> and George Lomonosoff <sup>4,\*</sup>

<sup>1</sup> Department of Plant Physiology and Molecular Biology, University of Plovdiv, Plovdiv, 4000, Bulgaria; gerganaz@uni-plovdiv.bg

<sup>2</sup> Center of Plant Systems Biology and Biotechnology, Plovdiv, 4000, Bulgaria; minkov@cpsb.eu

<sup>3</sup> Institute of Molecular Biology and Biotechnologies, Plovdiv, 4000, Bulgaria; toneva@plantgene.eu

<sup>4</sup> Department of Biological Chemistry, John Innes Centre, Norwich Research Park, Colney NR4 7UH, UK; george.lomonosoff@jic.ac.uk

\* Correspondence: (G.Z.); george.lomonosoff@jic.ac.uk (G.L.); Tel.: +359 32 261529 (G.Z.); Tel.: + 44 1603 450351 (G.L.)

## Supplementary Materials:

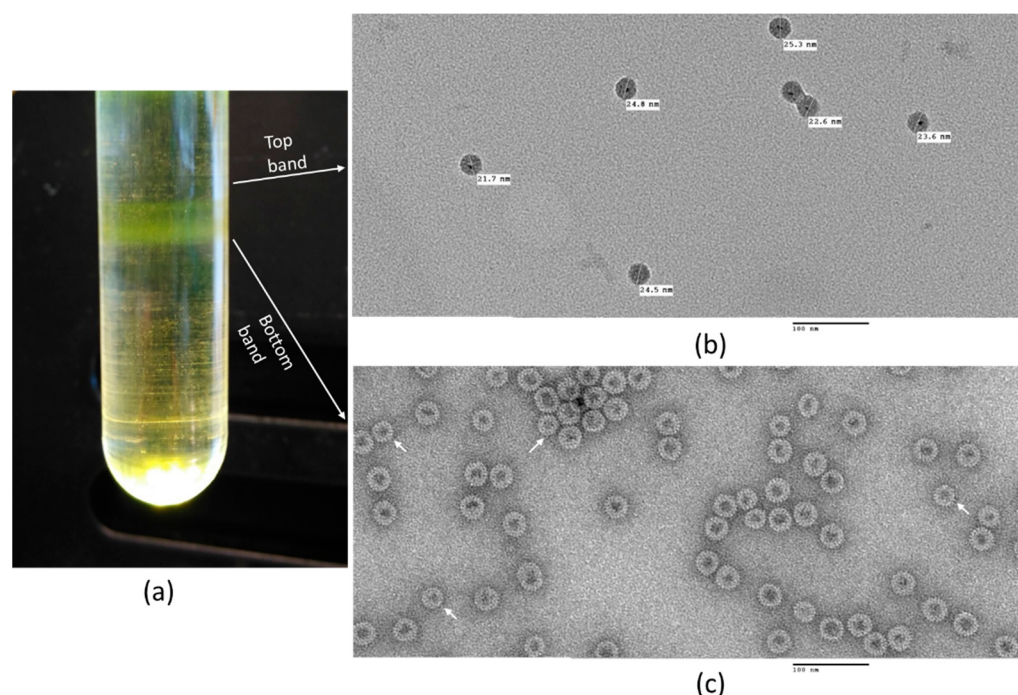

**Figure S1.** Nycodenz gradient purification and transmission electron microscopy (TEM) for the detection of HBcAg VLPs. (a) Visualization of two bands in Nycodenz gradient by downward illumination of the tube; (b) Negative stain TEM of the top band from Nycodenz gradient; (c) Negative stain TEM of bottom band from Nycodenz gradient. Scale bar = 100 nm. Arrows indicate smaller particles.

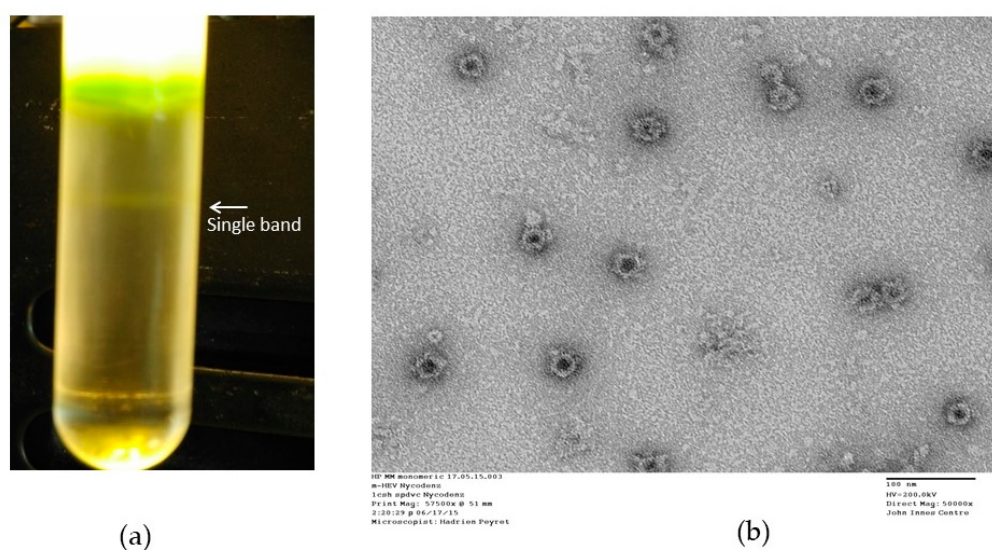

**Figure S2.** Nycodenz gradient purification and transmission electron microscopy (TEM) detection of HBcHEV ORF2 551–607 VLPs. (a) Visible single band of VLPs observed from Nycodenz gradient; (b) TEM imaging of the collected single band. Particles were visualized by negative staining with uranyl acetate. Scale bar = 100 nm.
